# Supplementary material
Source: PubMed Central journal article supplement (PMC7857427)

**Figure 1**

**A**

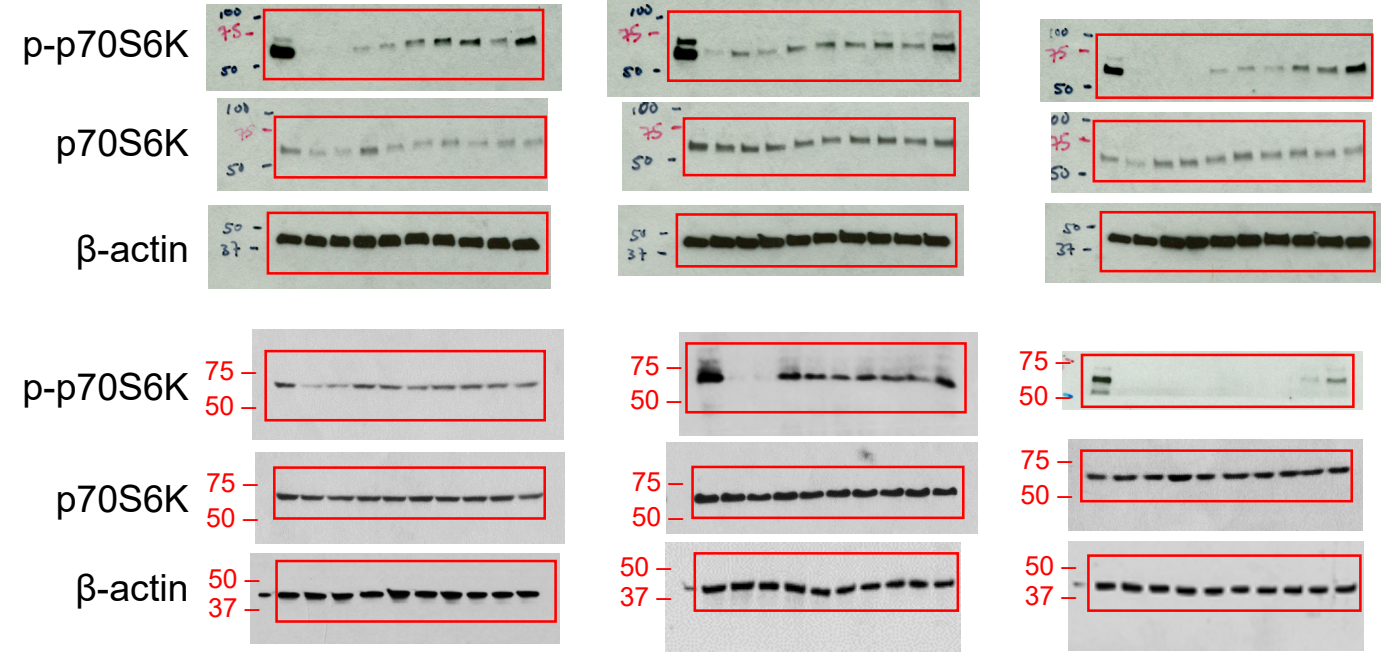

**B**

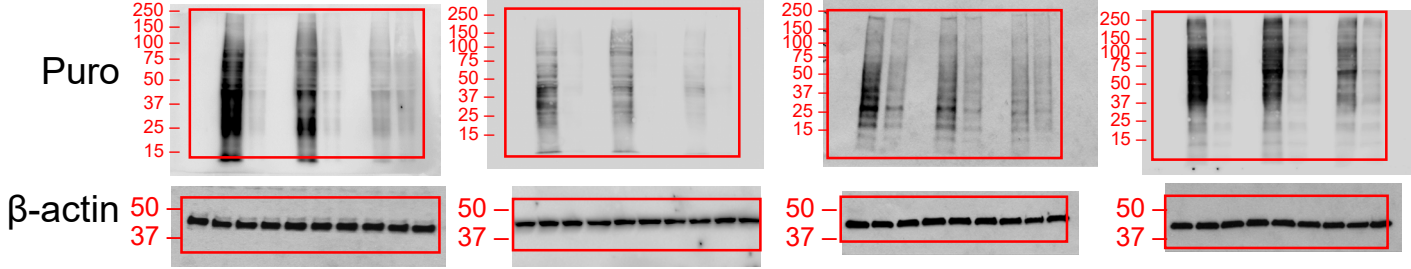

**C**

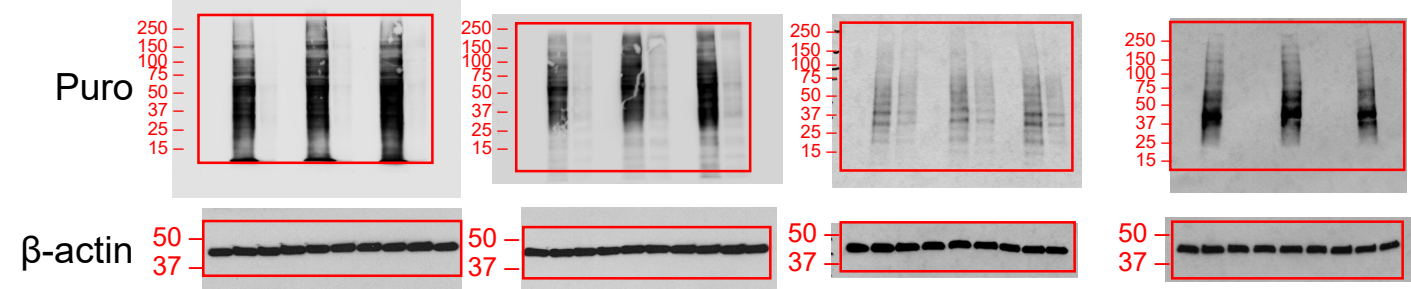

Supplement: EMBR-22-e51239-s003.pdf [file EMBR-22-e51239-s003.pdf]

**Figure 4**

**A**

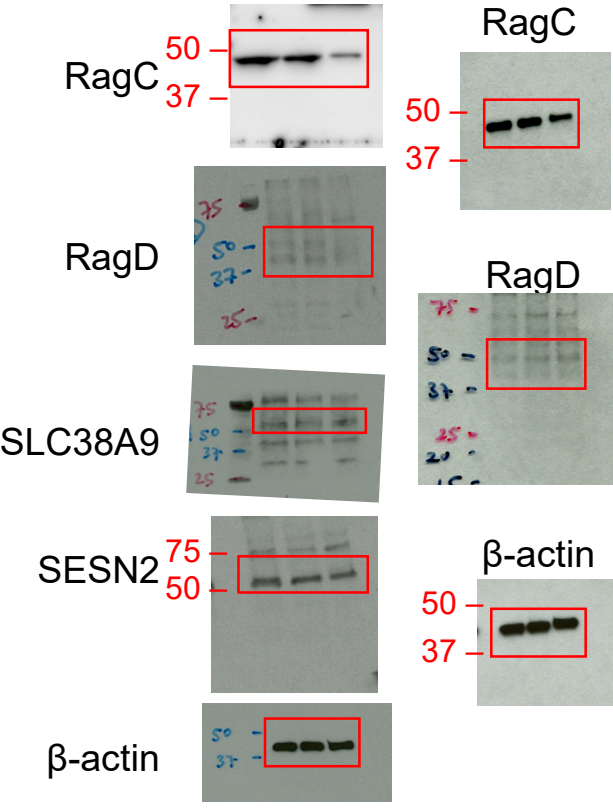

**B**

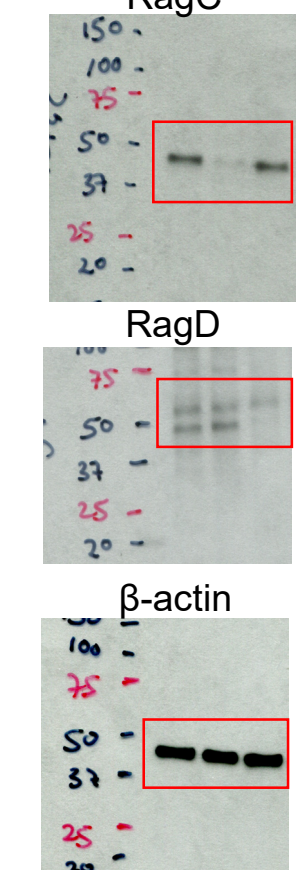

**C**

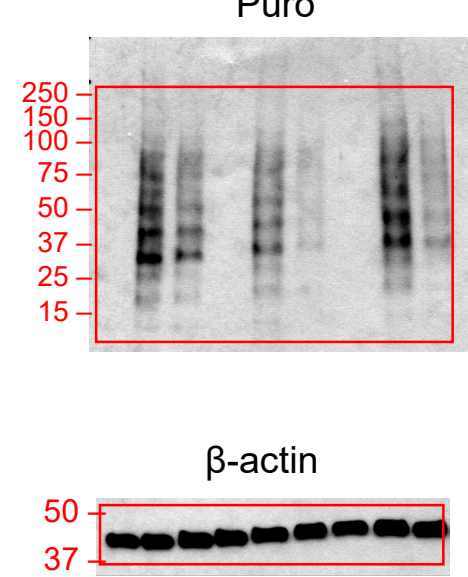

**D**

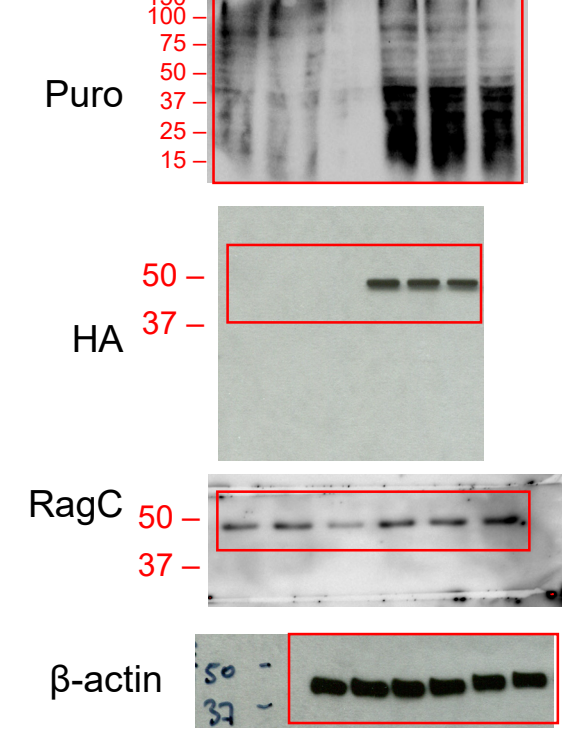

**E**

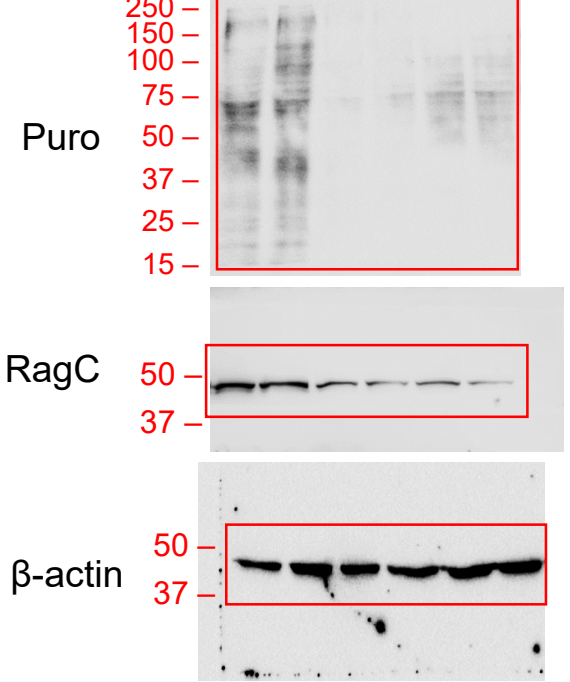

Supplement: EMBR-22-e51239-s004.pdf [file EMBR-22-e51239-s004.pdf]

**Figure 5**

**A**

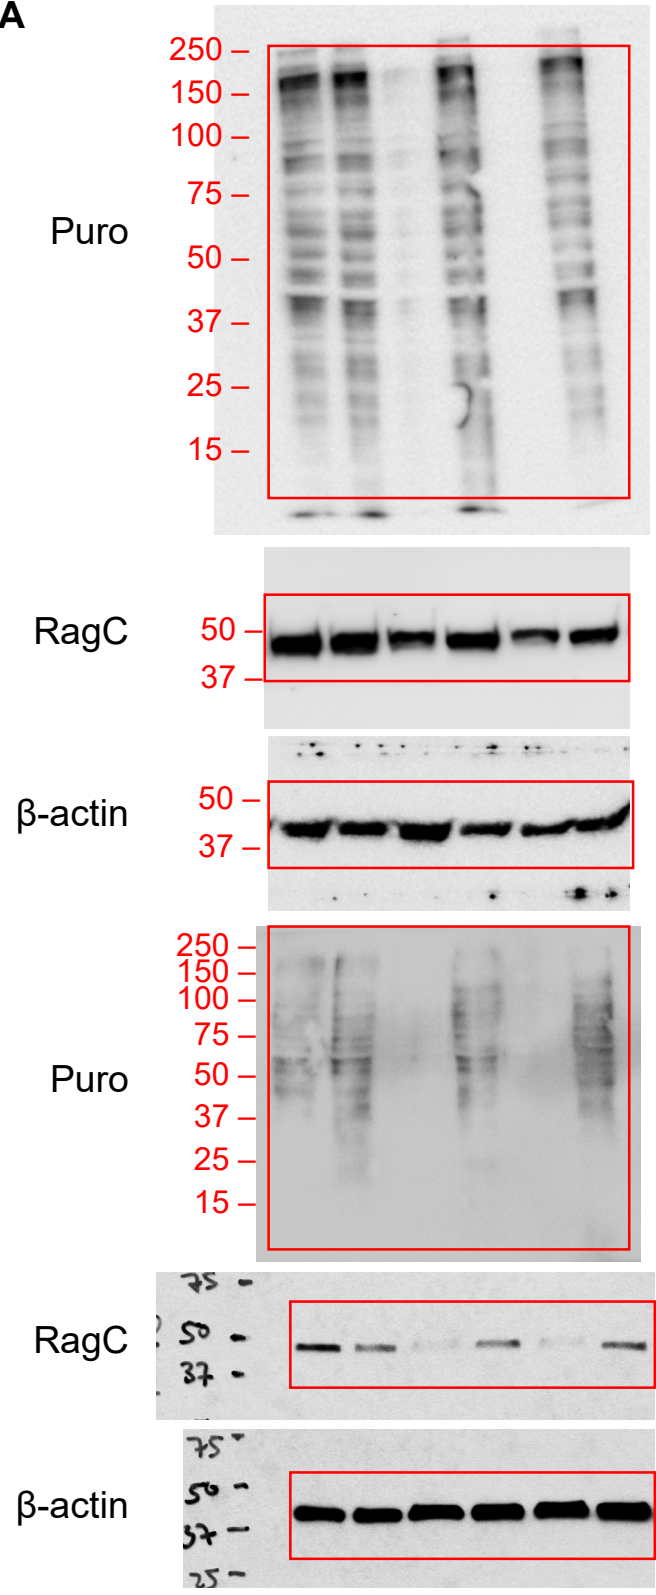

Supplement: EMBR-22-e51239-s005.pdf [file EMBR-22-e51239-s005.pdf]
